# Supplementary material for: The role of clonal communication and heterogeneity in breast cancer
Source: Springer Nature journal article supplement (doi:10.1186/s12885-019-5883-y), 2019-07-05

**a**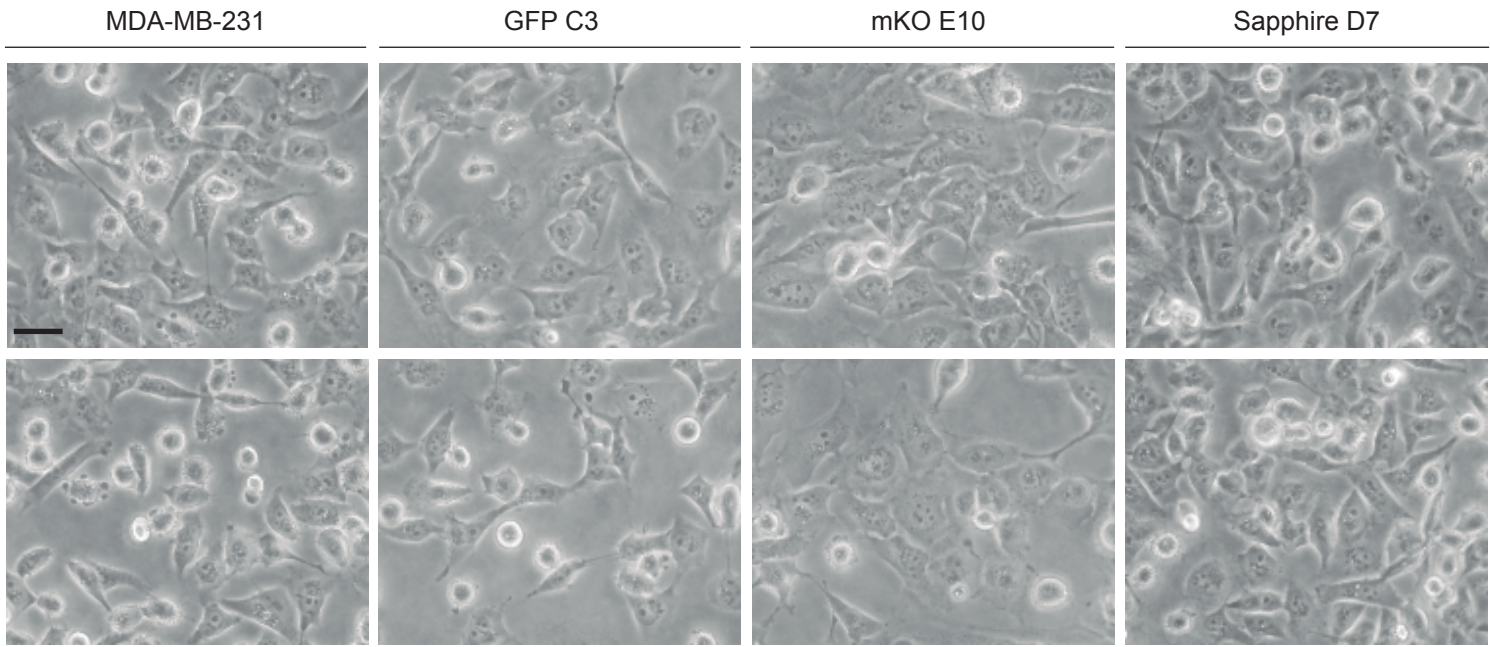**b**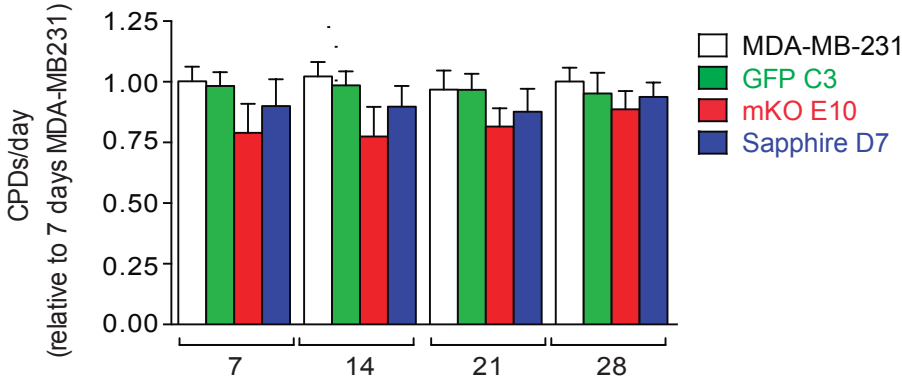**c**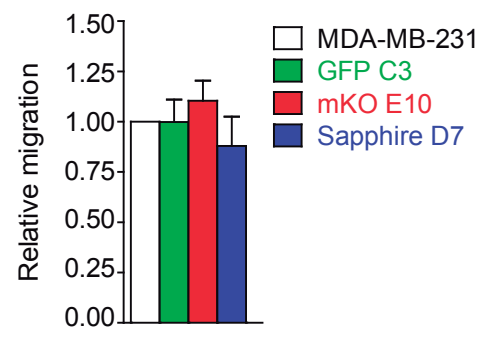**d**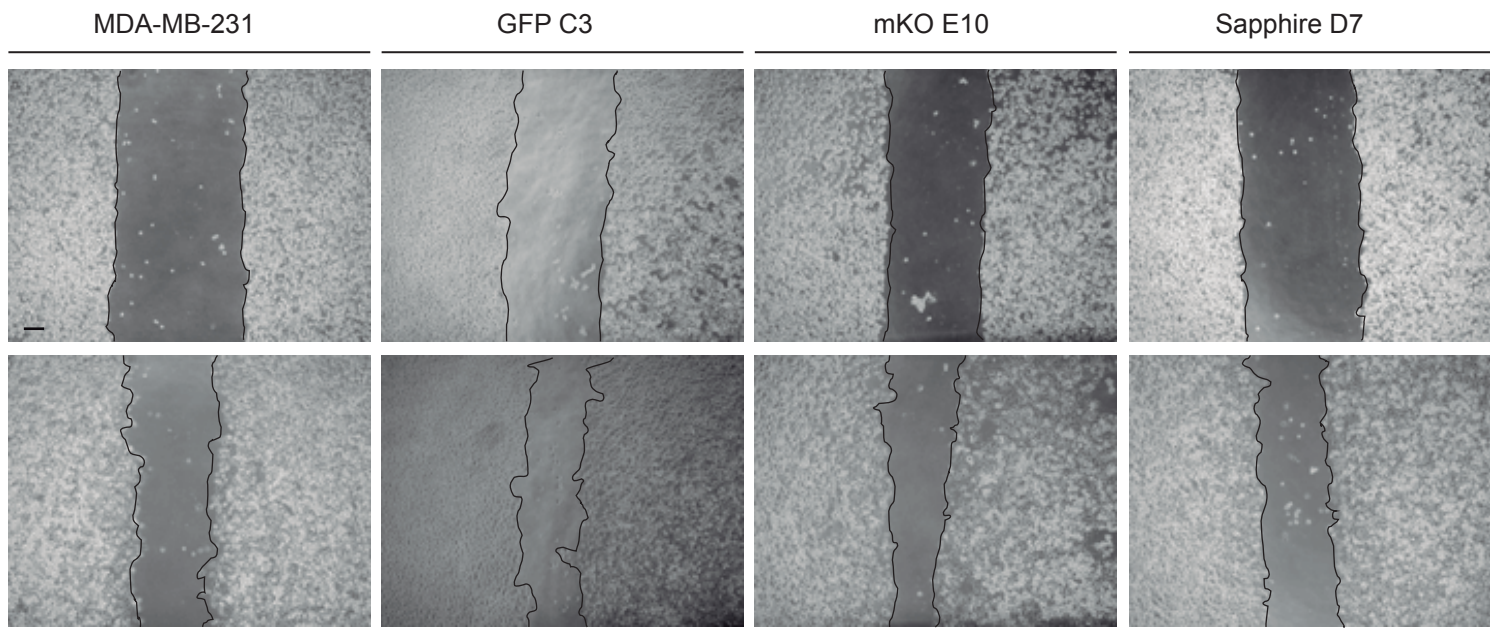

Supplement: MOESM2 [file 16900944]
